# Supplementary material for: Free-standing molecularly imprinted photonic hydrogels based on β-cyclodextrin for the visual detection of l-tryptophan
Source: Royal Society of Chemistry journal article supplement (doi:10.1039/c5ay01839k), 2015-01-01
Supplement: c5ay01839k1.pdf [file c5ay01839k1.pdf]

Supporting Information for:

A Free-standing Molecularly Imprinted Photonic Hydrogels Based on  $\beta$ -Cyclodextrin  
for Visual Detection of L-Tryptophan

Zhaokun Yang, Dongjian Shi, Mingqing Chen, and Shirong Liu\*

The Key Laboratory of Food Colloids and Biotechnology, Ministry of Education,  
School of Chemical and Material Engineering, Jiangnan University, Wuxi 214122,  
P. R. China

\*Corresponding Author. E-mail: [liushirong1@aliyun.com](mailto:liushirong1@aliyun.com).

Fig. S1 exhibited the typical SEM photos of the adopted colloidal-crystal template and the resultant hydrogel inverse opal film, as well as the photograph of MIPHS. Fig. S2 presented FT-IR spectra of  $\beta$ -CD and MAH- $\beta$ -CD. Fig S3 showed the Bragg diffraction spectra of PAM-MIPHS when soaked into pure buffer solution and  $10^{-12}$  M L-Trp buffer solutions. Fig. S4 showed the imprinting effect of CD-MIPHS with different amounts of MAH- $\beta$ -CD, AM or BIS. In analogy to the definition of imprinting factor of MIPs, the photonic imprinting factor (PIF) is calculated from the Bragg diffraction wavelength shift of MIPHS and NIPHS ( $PIF = \Delta\lambda_{MIPHS} / \Delta\lambda_{NIPHS}$ ).

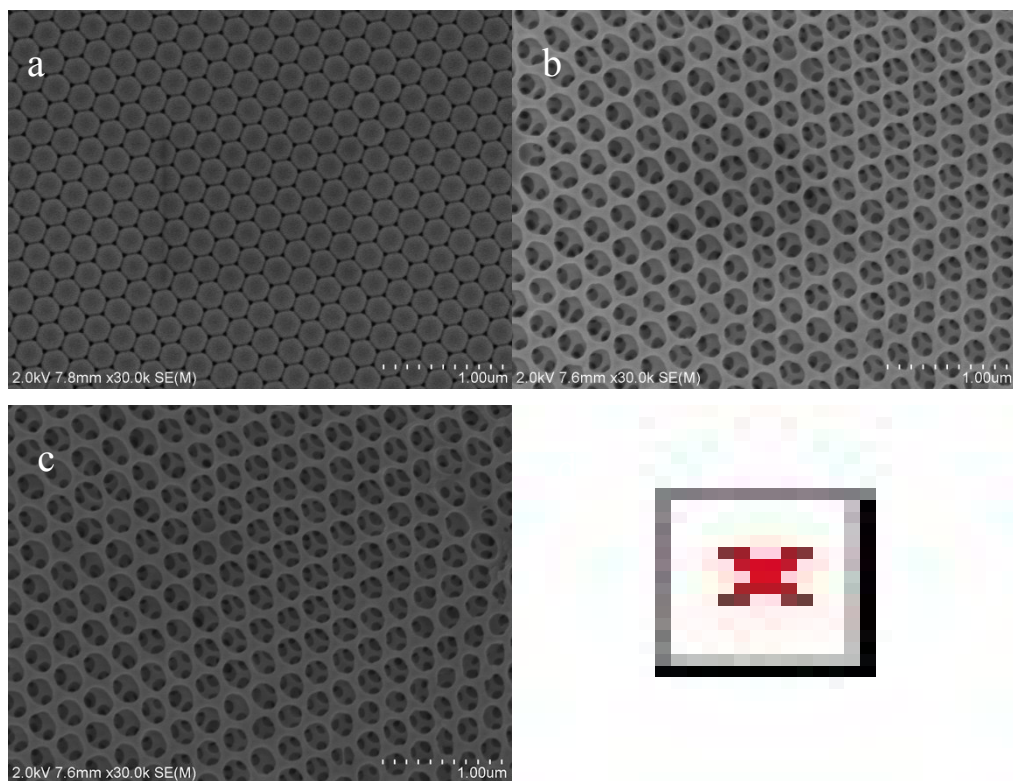

Fig. S1. SEM images of (a) PS colloidal crystals, (b) inverse opals of MIPHs, (c) inverse opals of PAM-NIPHs and (d) photograph of MIPHs.

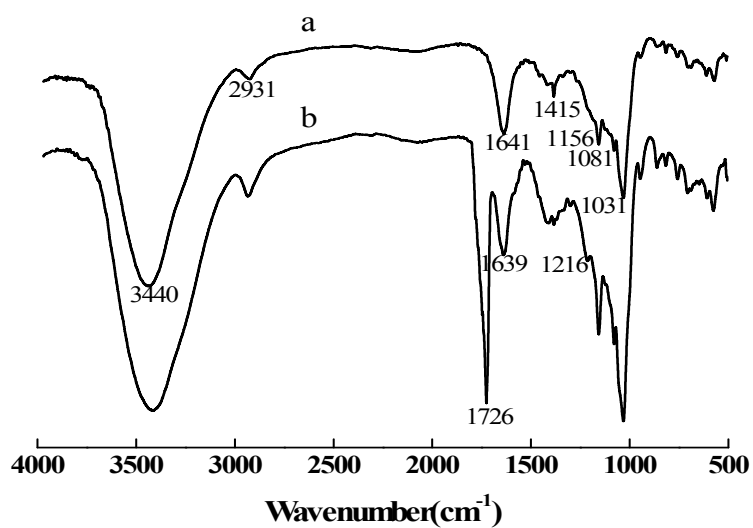

Fig. S2 FT-IR spectra of (a)  $\beta$ -CD and (b) MAH- $\beta$ -CD.

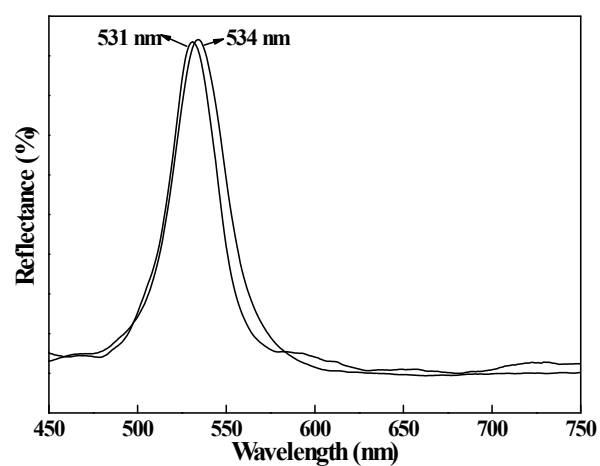

Fig. S3 Bragg diffraction spectra of PAM-MIPHs upon exposure to pure buffer solution and  $10^{-12}$  M L-Trp buffer solutions.

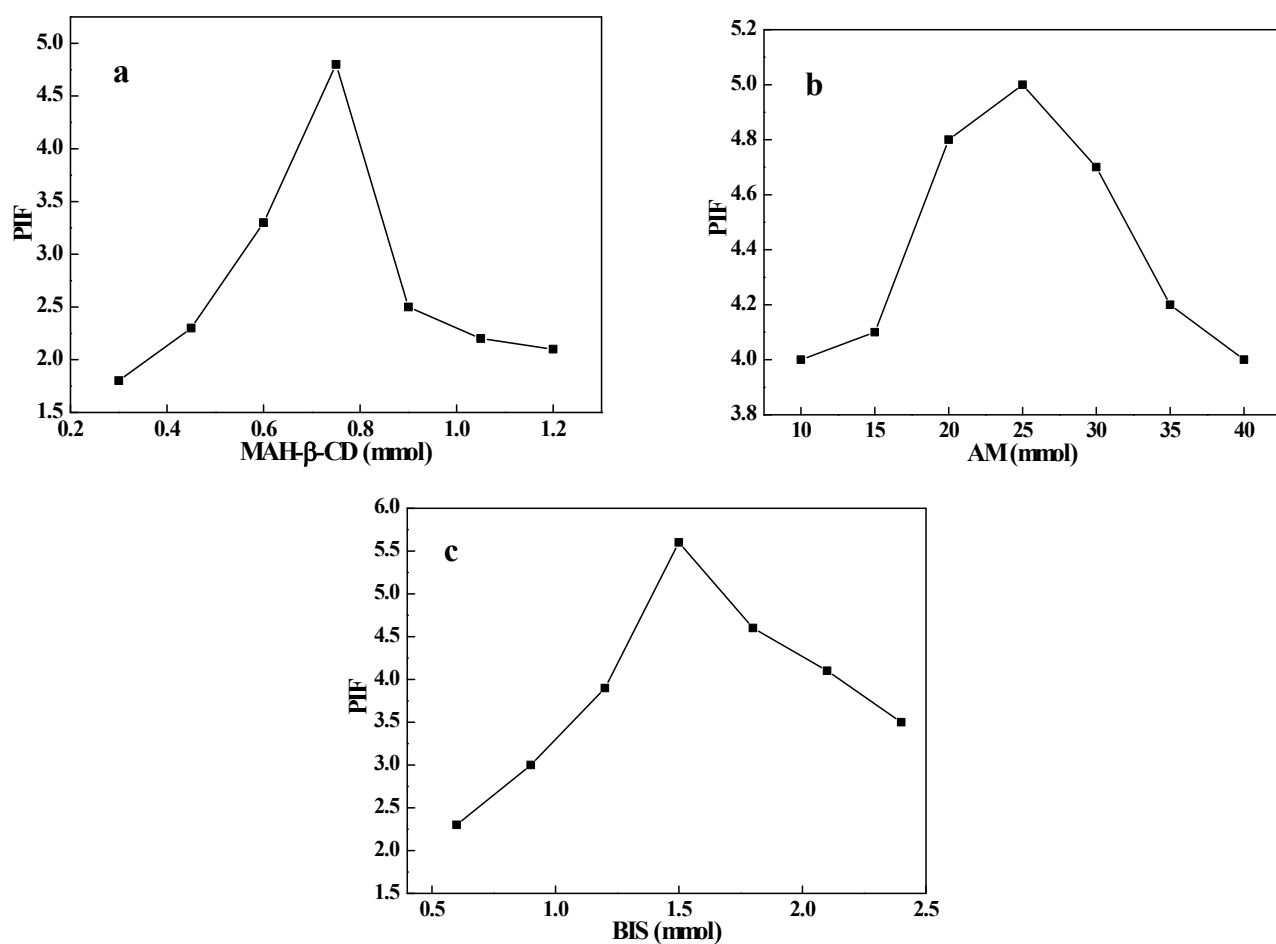

Fig. S4 Imprinting effect of MIPHs with different amounts of (a) MAH-β-CD, (b) AM and (c) BIS in L-Trp ( $10^{-5}$  mol.L<sup>-1</sup>) buffer solution.
